# Supplementary material for: Clinical perspectives and outcomes of the giant breast phyllodes tumor and sarcoma: a real-world retrospective study
Source: BMC Cancer. 2023 Aug 28;23:801. doi: 10.1186/s12885-023-11279-2 (PMC10463853; doi:10.1186/s12885-023-11279-2)
Supplement: Supplementary file 2 — Additional file 2. [file 12885_2023_11279_MOESM2_ESM.xlsx]

## Sheet: Sheet1
Identity number	Age	Female	Hospitalize	Tumor size	Cutting Edge	surgery1mastectomy 2 局部无切缘无扩大 3 局部扩大切 4 保乳术	lymph nodes 1 SLNB 2 ALND	lymph nodes Metastasis	1Left2 Right	Margin>1cm	diagnosis 1 benign 2 borderline 3 malignant	Pathology	Reception	epithelial overgrowth	mesenchymal mild1 severe2	Mitosis/HFP	Necrosis	stomal cellularity，1 mild，2 moderate 3 marked	stomal atypia 1 mild 2 moderate 3 marked	infiltration	Tel	Relapse	Chemotherapy	Radiotherapy	OS	DFS	LR
1	33	female	0001317203	7	2	2	0		1	0	2	AF1502946	2015-03-05 13:31:03	1	1	7	0	3	2	0	13654217302				89	89	0
2	50	female	0001319487	2	4	3	0		1	1	2	AF1503147	2015-03-10 13:04:18	1	2	3	0	3	2	0	？				89	89	0
3	68	female	0001324030	6	1	1	0		2	1	2	AF1503508	2015-03-17 14:08:36	0	2	1	1	3	1	0	13948134060				89	89	0
4	57	female	0001377065	3	4	3	0		1	1	2	AF1509222	2015-07-07 09:33:36	1	2	6	1	2	2	1	13624215625				85	85	0
6	53	female	0001454718	7	2	2	0		2	0	2	AF1517655	2015-12-17 11:47:18	0	1	2	0	1	2	0	15940094897				80	80	0
7	50	female	0001468700	3	4	3	0		1	1	2	AF1600918	2016-01-19 10:59:47	1	2	6	0	3	1	1	13998205185				79	79	0
8	28	female	0001472761	5	4	3	0		1	1	2	AF1601114	2016-01-21 13:38:52	1	1	5	0	1	1	0	13478879811				79	79	0
9	39	female	0001474541	2	2	2	0		2	0	2	AF1601303	2016-01-25 14:55:53	1	2	4	0	3	1	0	18640101586				78	78	0
10	43	female	0001479497	4	4	3	0		2	1	2	AF1601789	2016-02-03 14:43:44	1	2	9	0	3	3	0	15368916887				78	78	0
11	36	female	0001494363	8	4	3	0		1	0	2	AF1603123	2016-03-08 17:23:17	0	2	1	0	3	1	0		28m			77	28	1
12	48	female	0001024207	1	4	3	0		1	1	2	AF1603129	2016-03-09 09:12:56	1	2	1	0	2	2	0	13504056800				77	77	0
13	51	female	0000305782	5	4	4	0		2	1	2	AF1606503	2016-05-12 16:40:27	1	2	1	0	3	1	0	13840285309				75	75	0
14	44	female	0001551375	7	2	2	0		2	0	2	AF1608612	2016-06-23 15:49:04	0	2	6	0	3	1	0	13841091785	24m	0		73	24	1
15	14	female	0001581333	4	4	3	0		1	1	2	2	2016-08-23 10:50:52	1	1	1	0	1	1	0	15898074577				71	71	0
16	54	female	0000646630	3	1	1	0		1	1	2	BA1902801	2019-06-28 13:37:35	1	2	5	0	3	1	0	15140068422				37	37	0
18	52	female	0002379838	8	1	1	0		1	1	2	BA2103823	2021-09-23 08:51:09	0	2	3	0	2	2	0					11	11	1
19	43	female	0001745383	2	4	3	0		1	1	2	BF1702830	2017-07-03 14:09:50	0	2	2	0	3	1	0	13840217738	0			61	61	0
20	35	female	0001765920	2	4	3	0		2	1	2	BF1703470	2017-08-10 11:01:44	1	2	6	0	2	2	0	18241233123	2019			60	24	1
21	46	female	0001822996	6	4	4	0		1	1	2	BF1705225	2017-11-30 15:06:11	1	2	5	0	3	2	0	15842360306				56	56	0
22	60	female	0001914522	2	4	4	0		2	1	2	BF1802136	2018-05-17 14:27:24	0	2	8	0	2	2	0	18624098922				51	51	1
23	65	female	0001926917	2	4	4	0		2	1	2	BF1802512	2018-06-07 11:16:02	1	2	6	0	3	1	0	15304903111	0			50	50	0
24	39	female	0001947135	6	4	3	0		2	1	2	BF1803096	2018-07-17 12:52:09	0	1	5	0	2	2	0	13998855825	0			49	49	0
25	48	female	0002018950	8	2	2	0		1	0	2	BF1805366	2018-12-10 13:32:24	1	1	3	1	2	2	0	14747599960				44	44	0
26	34	female	0002028270	2	4	3	0		2	0	2	BF1900029	2019-01-03 15:39:24	1	2	8	0	2	3	0	13898840252	0			43	43	0
27	57	female	0002103418	2	4	4	0		1	1	2	BF1904789	2019-10-28 13:59:40	1	2	5	0	3	2	0	13032437930	10m lymph metastasis			33	10	1
28	52	female	0002188786	3	4	3	0		1	1	2	BF2000053	2020-01-06 11:51:14	1	2	6	0	3	2	0	13042423512				31	31	0
29	33	female	0002208924	3	4	4	0		2	1	2	BF2000684	2020-04-16 10:00:51	1	2	6	0	3	1	0	13614054444				28	28	0
30	53	female	0002229441	5	1	1	2		2	1	2	BF2001678	2020-07-06 09:22:58	1	2	6	0	3	1	0	15004036070				25	25	0
31	50	female	0002236977	9	1	1	1		1	1	2	BF2002022	2020-07-28 10:34:47	1	2	2	1	3	1	0	13644034688				24	24	0
32	58	female	0002247711	3	1	1	0		1	1	2	BF2002538	2020-08-27 09:44:31	1	1	5	0	2	2	0	13941416299				23	23	1
33	35	female	0001534983	9	4	3	0		1	1	2	BF2002866	2020-09-15 15:24:39	0	2	9	0	3	1	1		18m left side relapse			23	18	1
34	54	female	0002286532	7	1	1	1		1	1	2	BF2004633	2020-12-16 16:02:32	0	2	10	0	3	1	1	15640537811				20	20	0
35	68	female	0002351585	3	4	3	0		2	0	2	BF2102764	2021-07-02 14:45:03	0	1	5	0	2	1	0	18624322480				13	13	0
36	54	female	0002018129	6	4	4	0		1	1	2	CF1800428	2018-12-06 09:22:25	0	2	5	0	1	1	0	13019363937				44	44	0
38	62	female	0002230763	2	4	3	0		2	1	2	CF2000081	2020-07-09 09:50:32	0	2	8	0	3	1	0					25	25	0
39	51	female	0000271459	3	1	1	0		2	1	2	F200611793		1	2	2	0	3	1	0					194	194	0
40	43	female	0000242509	3	1	1	0		1	1	2	F200615494		0	2	5	0	3	2	0					192	192	0
41	48	female	0000282447	3	4	3	0		1	1	2	F200616510		0	2	8	0	2	2	0					192	192	0
42	38	female	0000292409	2	2	2	0		2	0	2	F200620832		1	1	0	0	1	3	0	13079288688	2019 left side mastectomy			190	156	1
44	53	female	0000417873	5	4	3	1		2	1	2	F200813941		1	1	4	0	3	2	0					170	170	1
45	46	female	0000438838	6	4	3	0		1	1	2	F200822011		0	1	3	0	3	1	0					168	168	1
46	29	female	0000450175	2	2	2	0		1	0	2	F200826160		1	1	3	0	3	1	0					166	166	0
47	50	female	0000604508	4	4	3	0		1	0	2	F201015042		1	1	7	0	3	3	0	13840439809				147	147	0
48	50	female	0000615139	7	2	2	0		1	0	2	F201016428		1	1	1	0	1	1	0	15904107577				147	147	0
49	45	female	0000562725	5	4	4	0		2	1	2	F201020347		1	1	0	0	2	2	0	13898177139				146	146	0
50	53	female	0000639271	10	1	1	0		1	1	2	F201026125		0	1	1	0	2	0	0	13841345115				144	144	0
51	47	female	0000572290	2	4	3	0		1	0	2	F201042093		0	1	0	0	3	2	0	13998116911				140	140	0
52	35	female	0000541179	4	1	2	0		1	0	2	FH20094582		0	2	2	0	2	3	0	89825343	96m			155	96	1
53	48	female	0001002615	3	4	3	0		1	1	2	201314558		1	1	0	0	1	1	0	13940209625				112	112	0
54	57	female	0001023299	7	1	1	0		2	1	2	201321551		1	2	3	1	3	1	1	13309820786				111	111	0
55	42	female	0001032256	6	1	1	1		2	1	2	201324602		0	2	5	0	2	1	0					110	110	0
56	25	female	0001040284	3	4	3	0		1	1	2	201327831		1	1	3	0	2	3	0	15141468863	48m, 8 year again			109	48	1
57	44	female	0001060714	2	4	2	0		2	0	2	201333886		1	2	2	0	3	0	0	13940456111				108	108	0
58	26	female	0001071142	3	4	3	0		1	0	2	201337450		1	2	3	0	3	1	0	13842134444	30m	30m		107	30	1
59	40	female	0001082313	3	4	2	0		2	0	2	201341357		1	1	1	0	3	2	0	13941714242				106	106	0
60	23	female	0001083902	5	2	2	0		1	0	2	201342178		1	1	3	0	2	2	0	13842720150	34m relapse			106	34	1
61	18	female	0001090459	3	2	2	0		1	0	2	201344170		1	2	3	0	3	2	0	15998116575	13m tumor relapse;44m mastectomy			105	13	1
62	24	female		3	2	2	0		2	0	2	201347444		1	2	2	0	3	2	0	13804976981				105	105	0
63	45	female	0001102815	6	2	2	0		2	0	2	201348790		0	2	4	0	3	2	0	18704076271				104	104	0
65	19	female	0001125028	4	4	3	0		1	1	2	201402780		1	1	3	0	3	3	0	15104020135				103	12	1
66	45	female	0001134656	4	1	1	0		2	1	2	201405810		0	2	1	0	3	1	1	13674253727				102	102	0
67	49	female	0001137460	7	1	1	2		2	1	2	201406649		1	2	6	0	3	1	1	15640201664				101	101	0
68	63	female	0001168168	4	4	2	0		2	0	2	201417711		1	1	3	0	3	1	0	13998759790				100	100	0
69	48	female	0001222085	4	4	2	0		2	0	2	201435591		1	2	5	0	3	2	0	15998804053				96	96	0
70	40	female	0001231417	3	2	3	0		2	0	2	201438720		1	2	1	0	2	0	0	15909816618				95	95	0
71	10	female		7	2	2	0		1	0	2	201449414		1	2	3	0	3	1	0	13841253704				93	93	0
72	16	female	0001287739	3	2	2	0		1	0	2	201453619		1	2	4	0	3	1	0	13555789900				92	92	0
73	39	female	0000728460	3	2	2	0		1	0	2	F201113181		0	1	5	0	3	1	0	15804057898				136	136	0
74	59	female	0000736359	4	2	2	0		2	0	2	F201116207		0	1	3	0	2	2	1	15842720434				135	135	0
75	48	female	0000750681	6	2	2	0		2	0	2	F201121197		1	1	0	0	3	2	0	13889227117				134	134	0
76	39	female	0000758522	7	4	1	0		2	1	2	F201124625		0	1	3	0	3	2	0	18842351065				133	133	0
77	46	female	0000762904	6	4	3	0		1	1	2	F201125942		0	1	2	0	2	1	0	13940512261				133	133	0
78	57	female	0000774920	6	2	2	0		1	0	2	F201130738		0	1	2	0	2	1	0	13940310727				132	132	0
79	46	female	0000821641	2	1	1	0		1	1	2	F201201171		0	1	1	0	3	3	0	15998857018				127	127	0
80	57	female	0000833083	2	4	3	0		1	1	2	F201203303		0	1	1	0	3	2	0	13516096768				126	126	0
81	52	female	0000837397	3	1	3	2	1	1	1	2	F201206312		0	1	6	0	3	1	0	13030328172				125	125	0
82	46	female	0000841598	8	1	1	0		2	1	2	F201206750		1	1	1	0	2	0	0	13840046337				126	126	0
83	35	female	0000843490	3	2	2	0		1	0	2	F201207470		1	1	4	0	3	1	0	18940257601				125	125	0
84	48	female	0000875620	3	4	3	0		1	1	2	F201220154		1	1	0	0	1	2	1	13284266722				123	123	0
85	38	female	0000883275	4	4	2	0		2	0	2	F201223117		1	1	1	0	3	1	0	13609835569				122	122	0
86	50	female	0000889022	5	4	2	0		1	0	2	F201225558		1	1	1	1	3	1	0	15184207897				121	121	0
87	45	female	0000953570	2	4	3	0		1	1	2	F201249126		1	1	4	0	2	2	0	13998813415				116	116	0
88	52	female	0000754057	7	1	1	0		2	1	2	FH20112295		1	1	1	0	3	2	0	13002490689				134	134	0
89	50	female	0000986984	2	4	3	0		2	1	2	FH20131095		1	1	1	0	3	2	0	13066737562				113	113	0
90	43	female	0001039138	3	4	2	0		1	0	2	FH20134038		1	1	1	0	3	3	0	13079285852				109	109	0
91	50	female	0001134049	7	4	1	0		2	1	2	H20140774		1	1	0	0	2	1	1	13079200080				102	102	0
153	58	female	0002024779	6	1	1	0	2	2	1	2	BF1805595	2018-12-21 11:20:03	0	2	3	0	2	2	0	13889266980	13998135047	13889266980		51	51	0
183	58	female	2247711	3	2	2	0	1	1	1	2	BF2002538		1	1	3	0	2	2	0					36	36	0
216	66	female	0002416237	3	4	3	0	2	2	1	2	BF2106479	2021-12-22 09:29:20	1	2	3	0	3	1	0					15	15	0
219	50	female	0002446308	2	2	2	0	1	1	0	2	BF2200962	2022-02-18 19:33:24	0	1	3	0	2	1	0					13	13	0
326	83	female	0001101507	7	1	1	0	1	1	1	2	201350023		1	2	5	0	2	2	0	18704101216				96	96	0
342	35	female	0001235336	3	4	3	0	1	1	1	2	201441163		1	2	8	0	3	2	0	13898810718				102	102	0
1	42	female	0001297343	7	1	1	0		1	1	3	AA1501181	2015-01-22 08:09:45	1	2	3	1	3	3	0	15247934999				91	9	1
2	39	female		3	4	3	0		2	1	3			0	2	1	0	2	3	0					82	36	1
3	51	female	0001621222	4	4	4	0		1	1	3	AF1615388	2016-11-15 13:39:22	1	2	5	0	2	2	1	13942158422				69	69	0
4	48	female	0001633142	6	2	2	0		2	0	3	AF1616718	2016-12-12 10:13:36	0	1	5	0	3	3	0	15241201280	8m before fibrosarcoma			68	8	1
5	63	female	0001986132	3	2	2	0		2	0	3	AF1811835	2018-09-26 10:51:00	1	2	10	0	3	3	0	13940440499				46	46	0
6	67	female	0002058465	5	4	3	0		2	1	3	AF1902633	2019-03-15 12:45:39	0	1	7	0	2	3	0	13478367490				40	40	0
7	38	female	0001956882	9	4	3	0		1	1	3	BA1802994	2018-08-06 09:48:23	1	2	》10	0	3	1	0	15640755880				48	48	0
8	49	female	0002111799	9	4	3	0		1	1	3	BA1903014	2019-07-11 08:17:50	0	2	》10	1	3	3	1	18256025092				37	37	0
9	58	female	0002326617	3	4	3	0		1	1	3	BA2101427	2021-04-28 09:09:22	0	2	27	0	2	1	0					15	15	0
10	51	female	0001684511	4	4	3	0		1	1	3	BF1700970	2017-03-13 14:37:51	1	1	》10	0	2	2	0	15242882299				65	65	0
11	45	female	0001682242	3	4	4	0		2	1	3	BF1701036	2017-03-15 16:57:36	0	2	5	0	1	1	0	13841435099				64	64	0
12	48	female	0001765991	2	2	2	0		1	0	3	BF1703442	2017-08-09 09:21:05	1	2	5	0	3	3	0	18641665979				60	26	1
13	60	female	0000454560	4	4	4	0		2	1	3	BF1804151	2018-09-20 12:07:30	1	2	20	0	3	3	1	13998241898				47	47	0
14	52	female	0001995492	2	4	4	0		2	1	3	BF1804527	2018-10-23 09:33:36	1	2	6	0	3	1	0	18841987979				46	46	0
16	33	female	0001557512	6	2	2	0		2	0	3	BF1904863	2019-10-31 10:16:41	1	2	>10	0	3	1	0	13904049517				33	33	0
17	28	female	0002265453	9	1	1	1		2	1	3	BF2003368	2020-10-19 15:31:58	1	2	5	1	2	3	0	18840040004				22	16	1
18	49	female	0002321772	4	1	1	1		1	1	3	BF2101546	2021-04-25 09:57:36	0	2	9	1	2	2	1	15042450913				15	15	0
19	28	female	0002359866	5	4	3	0		1	1	3	BF2103362	2021-07-28 19:57:24	0	2	15	0	2	3	0	15142784432				12	12	0
22	49	female	0000411550	2	4	2	0		2	1	3	F200811077		1	2	3	0	3	1	0					171	171	0
23	57	female	0000423137	2	1	1	1		1	1	3	F200815843		1	1	6	0	3	1	0					170	120	1
24	76	female	0000501683	2	1	1	1		1	1	3	F200910436		0	2	3	0	3	2	0	13998198676				160	100	1
25	52	female	0000563412	4	1	1	0		2	1	3	F200932939		0	2	8	0	3	3	0	15998330811				152	152	0
26	47	female	0000579456	5	1	1	1		2	1	3	F201002805		0	1	3	0	3	2	0	13941327900				150	132	1
27	51	female	0000625547	9	1	1	0		2	1	3	F201020202		0	2	7	0	3	3	0	15542973265				146	143	1
29	57	female	0000964349	2	1	1	0		2	1	3	201301344		1	2	5	0	3	1	0	13904275456				115	115	0
30	59	female	0001021939	4	1	1	1		2	1	3	201321070		0	1	6	0	3	2	0	18242130707				111	111	0
31	44	female	0001256965	2	4	3	0		1	1	3	201447002		1	2	1	0	3	3	1	13504208687				94	94	0
33	45	female	0000754047	6	4	3	0		2	1	3	F201122895		0	2	8	0	2	1	0	15934997586				134	134	0
34	57	female	0000769516	3	1	1	2		2	1	3	F201128548		1	2	10	1	3	1	0	13624023319				132	132	0
36	32	female	0000884699	5	2	3	0		2	1	3	F201223725		1	2	1	0	3	2	0	13940834459				122	122	0
37	40	female	0001952311	10	1	1	0		2	1	6	BF1805689		0	1	2	1	3	3	0			TAC		43	43	0
80	46	female	0000332294	3	1	1	0	2	2	1	3	BA1600930	2016-05-09 09:07:01	1	2	0	0	3	2	0		13130226422	13464045691		81	81	0
114	51	female	0001684511	4	4	3	0	1	1	1	3	BF1700970	2017-03-13 14:37:51	1	1	》10	0	2	1	0		15242882299	13624928218		0	72	0
221	71	female	0002450759	6	1	1	1	2	1	1	3	BF2201414	2022-03-10 10:46:06	0	2	1	0	2	1	0					12	12	0
344	20	female	0001259961	10	1	1	2	0	1	1	1	201447687		1	2	5	1	3	3	0		1			100	6	1
465	41	female	0001610360	11	1	1	1	0	2	1	3	AF1614238		0	2	8	1	1	3	1		0	0	1		76	0
472	37	female	0002307843	15	1	1	2	0	1	1	3			0	1	8	1	3	3	0		0	0		metastasis	3	1
222	52	female	0002454076	16	1	1	2	0	1	1	1	BF2201499	2022-03-14 16:27:24	0	2	5	1	3	3	0						12	0
470	64	female	0001962347	21	1	1	0	0	1	1	2	BA1803076	2018-08-13 09:46:22	0	1	3	0	1	1	0						56	0
15	28	female	0002109245	15	1	1	1	0	2	1	1	BF1902957	2019-07-05 15:13:05	1	2	17	0	2	3	0	13840924575					37	1
28	51	female	0000648172	14	1	1	2	0	2	1	1	F201028405		0	1	3	0	3	3	0	13840309799					143	0
32	20	female	0001259961	22	1	1	2	0	1	1	1	201447687		1	2	5	0	3	3	0		9m				100	1
35	29	female	0000797664	13	1	1	1	0	1	1	1	F201139484		0	1	0	0	2	1	0	13904919798					129	0
37	40	female	0001952311	10	1	1	0	0	2	1	2	BF1805689		0	1	2	1	3	3	0			TAC	13898806501	13841435099	43	0
